# Supplementary material for: Dietary Habits before and during the COVID-19 Epidemic in Selected European Countries
Source: MDPI journal article supplement (doi:10.3390/nu13051690), 2021-05-16
Supplement: s1 [file s1]

**Table S1.** Alpha Cronbach test.

| <b><math>\alpha</math>-Cronbach/ split-half reliabilities</b> | <b>p-value</b> |
|---------------------------------------------------------------|----------------|
| Analyzed variables                                            |                |
| Cardinality-uninterpreted                                     | 0              |
| Cardinality-no data                                           | 0              |
| Significance level                                            | 0.05           |
| Cardinality                                                   | 1071           |
| Number of items                                               | 52             |
| Scale mean                                                    | 187.047619     |
| Standard deviation of the scale                               | 17.177647      |
| $\alpha$ -Cronbach value of the scale                         | 0.79921        |
| -95% CI for $\alpha$ -Cronbach value of the scale             | 0.781139       |
| +95% CI for $\alpha$ -Cronbach value of the scale             | 0.816011       |
| Standard error of measurement                                 | 7.697241       |
| Average correlation between item-pairs                        | 0.080723       |
| Standardized $\alpha$ -Cronbach value                         | 0.820344       |

**Table S2.** Comparison of adults' dietary habits before and during COVID-19 pandemic n=1071. Wilcoxon test.

| <b>Question</b>                                | <b>p-value</b> | <b>Sum of the positives ranks</b> | <b>Sum of the negatives ranks</b> |
|------------------------------------------------|----------------|-----------------------------------|-----------------------------------|
| Frequency of consumption of<br>4-5 meals a day | <0.001         | 61319.5                           | 14535.5                           |
| Eating at least one warm<br>meal               | <0.001         | 23694.0                           | 2871.0                            |
| Preparing homemade meals                       | <0.001         | 104719.5                          | 20030.5                           |
| Shopping frequency                             | <0.001         | 33744.0                           | 92007.0                           |
| Shopping in the supermarket                    | <0.001         | 17953.5                           | 92261.5                           |
| Shopping in local market-<br>place             | 0.003          | 49153.0                           | 74600.0                           |
| Shopping online                                | <0.001         | 92808.0                           | 2895.0                            |
| Ordering readymade meals<br>at restaurants     | 0.021          | 57779.5                           | 45505.5                           |
| Eat out                                        | <0.001         | 3187.5                            | 346678.5                          |

**Table S3.** The frequency of consumption of particular foods before and during COVID-19 for analyzed population n=1071. Wilcoxon test.

| <b>Product</b>          | <b>p-value</b> | <b>Sum of the positives ranks</b> | <b>Sum of the negatives ranks</b> |
|-------------------------|----------------|-----------------------------------|-----------------------------------|
| Frozen food             | <0.001         | 43936.0                           | 19967.0                           |
| Canned food             | <0.001         | 53548.5                           | 14716.5                           |
| Sweets and snacks       | <0.001         | 53407.5                           | 21512.5                           |
| Diary and eggs          | <0.001         | 14498.5                           | 3646.5                            |
| Cereal products         | <0.001         | 14429.0                           | 6481.0                            |
| Fats and oil            | 0.003          | 8260.0                            | 3216.0                            |
| Fruits                  | 0.059          | NS                                | NS                                |
| Vegetables and nuts     | 0.021          | 31604.0                           | 6622.0                            |
| Meat                    | 0.226          | NS                                | NS                                |
| Fish and seafood        | <0.001         | 10706.0                           | 23474.0                           |
| Coffee                  | 0.006          | 10647.0                           | 15918.0                           |
| Tea                     | <0.001         | 16120.0                           | 3186.0                            |
| Water                   | 0.000          | 4428.0                            | 1900.0                            |
| Juice and sweets drinks | <0.000001      | 10082.0                           | 21796.0                           |
| Alcohol                 | 0.002188       | 56476.5                           | 40984.5                           |

(NS – not significant).

**Table S4.** Nutritional behavior and shopping habits of consumers depending on the country of residence. Kruskal-Wallis analysis of variance (ANOVA).

| Question |    | Poland/United Kingdom | Poland/Austria | Austria/United Kingdom | p-value |
|----------|----|-----------------------|----------------|------------------------|---------|
| Question | 1a | NS                    | NS             | NS                     | 0.136*  |
|          | 1b | NS                    | 0.030          | NS                     | 0.033   |
| Question | 2a | <0.001                | <0.001         | NS                     | <0.001  |
|          | 2b | <0.001                | NS             | NS                     | <0.001  |
| Question | 3a | <0.001                | <0.001         | NS                     | <0.001  |
|          | 3b | <0.001                | <0.001         | NS                     | <0.001  |
| Question | 4a | <0.001                | 0.004          | NS                     | <0.001  |
|          | 4b | NS                    | NS             | NS                     | 0.256*  |
| Question | 5a | <0.001                | <0.001         | NS                     | <0.001  |
|          | 5b | <0.001                | <0.001         | NS                     | <0.001  |
| Question | 6a | 0.002                 | 0.018          | NS                     | 0.001   |
|          | 6b | NS                    | NS             | NS                     | 0.118*  |
| Question | 7a | NS                    | NS             | NS                     | 0.082*  |
|          | 7b | 0.029                 | NS             | NS                     | 0.032   |
| Question | 8a | <0.001                | <0.001         | NS                     | <0.001  |
|          | 8b | <0.001                | <0.001         | NS                     | <0.001  |
| Question | 9a | <0.001                | <0.001         | NS                     | <0.001  |
|          | 9b | 0.002                 | <0.001         | NS                     | 0.006   |

\*p>0.05, NS – not significant, a-before pandemic; b-during pandemic; 1a,b- frequency of consumption of 4-5 meals a day; 2a,b -at least one warm meal; 3a,b- frequency of preparation of home-made meals; 4a,b- shopping frequency; 5a,b- frequency of shopping in the supermarket; 6a,b- shopping from the local suppliers; 7a,b- frequency of shopping online; 8a,b- ordering ready-made meals at restaurants; 9a,b- frequency of eating out.

**Table S5.** Nutritional behavior of consumers depending on the country of residence. Kruskal-Wallis analysis of variance (ANOVA)

| Question |     | Poland/United Kingdom | Poland/Austria | Austria/United Kingdom | p-value |
|----------|-----|-----------------------|----------------|------------------------|---------|
| Question | 10a | 0.001                 | NS             | NS                     | 0.002   |
|          | 10b | <0.001                | 0.006          | NS                     | <0.001  |
| Question | 11a | 0.031                 | NS             | NS                     | 0.033   |
|          | 11b | 0.004                 | NS             | 0.019                  | 0.003   |
| Question | 12a | <0.001                | NS             | 0.009                  | <0.001  |
|          | 12b | NS                    | NS             | NS                     | 0.745*  |
| Question | 13a | NS                    | NS             | NS                     | 0.613   |
|          | 13b | <0.001                | NS             | NS                     | <0.001  |
| Question | 14a | <0.001                | <0.001         | NS                     | <0.001  |
|          | 14b | <0.001                | <0.0001        | NS                     | <0.001  |
| Question | 15a | NS                    | NS             | NS                     | 0.071*  |
|          | 15b | NS                    | NS             | NS                     | 0.082*  |
| Question | 16a | 0.001                 | <0.0001        | NS                     | <0.001  |
|          | 16b | 0.029                 | NS             | NS                     | 0.033   |
| Question | 17a | <0.001                | <0.001         | NS                     | <0.001  |
|          | 17b | <0.001                | <0.001         | NS                     | <0.001  |
| Question | 18a | <0.001                | <0.001         | NS                     | <0.001  |
|          | 18b | 0.002                 | 0.001          | NS                     | <0.001  |
| Question | 19a | NS                    | 0.001          | 0.010                  | <0.001  |
|          | 19b | NS                    | NS             | NS                     | 0.095*  |

|          |     |        |        |        |        |
|----------|-----|--------|--------|--------|--------|
| Question | 20a | <0.001 | <0.001 | 0.018  | <0.001 |
|          | 20b | <0.001 | <0.001 | <0.001 | <0.001 |
| Question | 21a | 0.014  | NS     | <0.001 | <0.001 |
|          | 21b | 0.001  | NS     | <0.001 | <0.001 |
| Question | 22a | NS     | NS     | NS     | 0.088* |
|          | 22b | NS     | NS     | NS     | 0.063* |
| Question | 23a | <0.001 | <0.001 | NS     | 0.001  |
|          | 23b | 0.006  | NS     | NS     | 0.006  |
| Question | 24a | NS     | NS     | NS     | 0.448* |
|          | 24b | NS     | NS     | NS     | 0.260* |

\*p>0.05, NS – not significant, a-before pandemic; b-during pandemic; frequency of consumption-10a,b- frozen food; 11a,b -canned food; 12a,b- sweets and snacks; 13a,b- dairy and eggs; 14a,b- cereal products; 15a,b- fats, oils; 16a,b- fruits; 17a,b- vegetables and nuts; 18a,b- meat; 19a,b- fish and seafood; 20a,b-coffee; 21a,b-tea; 22a,b-water; 23a,b-juice and sweets drink; 24a,b-alcohol.

#### Questionnaire S1. Comparison of dietary behaviours before and during the COVID19 pandemic.

Dear Sir/Madam,

The Sars-COV-2 pandemic has significant impact on our lives, including day-to-day activities and habits. The aim of this study is to examine the dietary behaviours before and during the pandemic among the society.

We would like you to complete the provided 10-minute questionnaire. It focuses on the dietary behaviour before and during the pandemic.

Each question requires 2 answers – first is about the frequency of specific action before the pandemic and the second is about the frequency of the action during pandemic. Please answer every question. If you are uncertain about how to answer a question then do the best you can, but please do not leave a question blank.

We really appreciate you taking this survey.

Yours sincerely,

Department of Food Commodity Science

Medical University in Gdansk

|                                                         |                                                 |
|---------------------------------------------------------|-------------------------------------------------|
| 1a) Before the pandemic I used to eat 4-5 meals per day | 1b) During the pandemic I eat 4-5 meals per day |
| <input type="checkbox"/> Never or almost never          | <input type="checkbox"/> Never or almost never  |
| <input type="checkbox"/> Once or less per month         | <input type="checkbox"/> Once or less per month |
| <input type="checkbox"/> Few times per month            | <input type="checkbox"/> Few times per month    |
| <input type="checkbox"/> Few times per week             | <input type="checkbox"/> Few times per week     |
| <input type="checkbox"/> Once a day                     | <input type="checkbox"/> Once a day             |
| 2a) Before the pandemic I used to go shopping for food  | 2b) During the pandemic I shop for food         |
| <input type="checkbox"/> Never or almost never          | <input type="checkbox"/> Never or almost never  |
| <input type="checkbox"/> Once or less per month         | <input type="checkbox"/> Once or less per month |
| <input type="checkbox"/> Few times per month            | <input type="checkbox"/> Few times per month    |

- ☐ Few times per week
- ☐ Once a day
- ☐ Few times per day

- ☐ Few times per week
- ☐ Once a day
- ☐ Few times per day

3a) Before the pandemic I used to do shopping in the supermarket

3b) During the pandemic I shop in the supermarket

- ☐ Never or almost never
- ☐ Once or less per month
- ☐ Few times per month
- ☐ Few times per week
- ☐ Once a day
- ☐ Few times per day

- ☐ Never or almost never
- ☐ Once or less per month
- ☐ Few times per month
- ☐ Few times per week
- ☐ Once a day
- ☐ Few times per day

4a) Before the pandemic I used to do shopping in the convenience

4b) During the pandemic I shop in the convenience

store or local marketplace

store or local marketplace

- ☐ Never or almost never
- ☐ Once or less per month
- ☐ Few times per month
- ☐ Few times per week
- ☐ Once a day
- ☐ Few times per day

- ☐ Never or almost never
- ☐ Once or less per month
- ☐ Few times per month
- ☐ Few times per week
- ☐ Once a day
- ☐ Few times per day

5a) Before the pandemic I used to do shopping online

5b) During the pandemic I do shopping online

- ☐ Never or almost never
- ☐ Once or less per month
- ☐ Few times per month
- ☐ Few times per week
- ☐ Once a day
- ☐ Few times per day

- ☐ Never or almost never
- ☐ Once or less per month
- ☐ Few times per month
- ☐ Few times per week
- ☐ Once a day
- ☐ Few times per day

6a) Before the pandemic I used to cook at home

6b) During the pandemic I cook at home

- ☐ Never or almost never
- ☐ Once or less per month
- ☐ Few times per month
- ☐ Few times per week
- ☐ Once a day
- ☐ Few times per day

- ☐ Never or almost never
- ☐ Once or less per month
- ☐ Few times per month
- ☐ Few times per week
- ☐ Once a day
- ☐ Few times per day

7a) Before the pandemic I used to order food from restaurants

7b) During the pandemic I order food from restaurants

or caterers

or caterers

- ☐ Never or almost never

- ☐ Never or almost never

- ☐ Once or less per month
- ☐ Few times per month
- ☐ Few times per week
- ☐ Once a day
- ☐ Few times per day

- ☐ Once or less per month
- ☐ Few times per month
- ☐ Few times per week
- ☐ Once a day
- ☐ Few times per day

8a) Before the pandemic I used to eat out

- ☐ Never or almost never
- ☐ Once or less per month
- ☐ Few times per month
- ☐ Few times per week
- ☐ Once a day
- ☐ Few times per day

8b) During the pandemic I eat out

- ☐ Never or almost never
- ☐ Once or less per month
- ☐ Few times per month
- ☐ Few times per week
- ☐ Once a day
- ☐ Few times per day

9a) Before the pandemic I used to eat at least 1 warm meal

- ☐ Never or almost never
- ☐ Once or less per month
- ☐ Few times per month
- ☐ Few times per week
- ☐ Once a day
- ☐ Few times per day

9b) During the pandemic I eat at least 1 warm meal

- ☐ Never or almost never
- ☐ Once or less per month
- ☐ Few times per month
- ☐ Few times per week
- ☐ Once a day
- ☐ Few times per day

10a) Before the pandemic I used to buy frozen food

- ☐ Never or almost never
- ☐ Once or less per month
- ☐ Few times per month
- ☐ Few times per week
- ☐ Once a day
- ☐ Few times per day

10b) During the pandemic I buy frozen food

- ☐ Never or almost never
- ☐ Once or less per month
- ☐ Few times per month
- ☐ Few times per week
- ☐ Once a day
- ☐ Few times per day

11a) Before the pandemic I used to buy long shelf life products  
(cans, jars, concentrates)

- ☐ Never or almost never
- ☐ Once or less per month
- ☐ Few times per month
- ☐ Few times per week
- ☐ Once a day
- ☐ Few times per day

11b) During the pandemic I buy long shelf life products  
(cans, jars, concentrates)

- ☐ Never or almost never
- ☐ Once or less per month
- ☐ Few times per month
- ☐ Few times per week
- ☐ Once a day
- ☐ Few times per day

12a) Before the pandemic I used to consume snacks and sweets 12b) During the pandemic I consume snacks and sweets

- |                                                 |                                                 |
|-------------------------------------------------|-------------------------------------------------|
| <input type="checkbox"/> Never or almost never  | <input type="checkbox"/> Never or almost never  |
| <input type="checkbox"/> Once or less per month | <input type="checkbox"/> Once or less per month |
| <input type="checkbox"/> Few times per month    | <input type="checkbox"/> Few times per month    |
| <input type="checkbox"/> Few times per week     | <input type="checkbox"/> Few times per week     |
| <input type="checkbox"/> Once a day             | <input type="checkbox"/> Once a day             |
| <input type="checkbox"/> Few times per day      | <input type="checkbox"/> Few times per day      |

13a) Before the pandemic I used to consume dairy and eggs 13b) During the pandemic I consume dairy and eggs

- |                                                 |                                                 |
|-------------------------------------------------|-------------------------------------------------|
| <input type="checkbox"/> Never or almost never  | <input type="checkbox"/> Never or almost never  |
| <input type="checkbox"/> Once or less per month | <input type="checkbox"/> Once or less per month |
| <input type="checkbox"/> Few times per month    | <input type="checkbox"/> Few times per month    |
| <input type="checkbox"/> Few times per week     | <input type="checkbox"/> Few times per week     |
| <input type="checkbox"/> Once a day             | <input type="checkbox"/> Once a day             |
| <input type="checkbox"/> Few times per day      | <input type="checkbox"/> Few times per day      |

14a) Before the pandemic I used to consume cereal products 14b) During the pandemic I consume cereal products

- |                                                 |                                                 |
|-------------------------------------------------|-------------------------------------------------|
| <input type="checkbox"/> Never or almost never  | <input type="checkbox"/> Never or almost never  |
| <input type="checkbox"/> Once or less per month | <input type="checkbox"/> Once or less per month |
| <input type="checkbox"/> Few times per month    | <input type="checkbox"/> Few times per month    |
| <input type="checkbox"/> Few times per week     | <input type="checkbox"/> Few times per week     |
| <input type="checkbox"/> Once a day             | <input type="checkbox"/> Once a day             |
| <input type="checkbox"/> Few times per day      | <input type="checkbox"/> Few times per day      |

15a) Before the pandemic I used to consume fats  
(eg. butter,margarine, olive oil, rapeseed oil etc.) 15b) During the pandemic I consume fats  
(eg. butter,margarine, olive oil, rapeseed oil etc.)

- |                                                 |                                                 |
|-------------------------------------------------|-------------------------------------------------|
| <input type="checkbox"/> Never or almost never  | <input type="checkbox"/> Never or almost never  |
| <input type="checkbox"/> Once or less per month | <input type="checkbox"/> Once or less per month |
| <input type="checkbox"/> Few times per month    | <input type="checkbox"/> Few times per month    |
| <input type="checkbox"/> Few times per week     | <input type="checkbox"/> Few times per week     |
| <input type="checkbox"/> Once a day             | <input type="checkbox"/> Once a day             |
| <input type="checkbox"/> Few times per day      | <input type="checkbox"/> Few times per day      |

16a) Before the pandemic I used to consume fruits 16b) During the pandemic I consume fruits

- |                                                 |                                                 |
|-------------------------------------------------|-------------------------------------------------|
| <input type="checkbox"/> Never or almost never  | <input type="checkbox"/> Never or almost never  |
| <input type="checkbox"/> Once or less per month | <input type="checkbox"/> Once or less per month |
| <input type="checkbox"/> Few times per month    | <input type="checkbox"/> Few times per month    |
| <input type="checkbox"/> Few times per week     | <input type="checkbox"/> Few times per week     |
| <input type="checkbox"/> Once a day             | <input type="checkbox"/> Once a day             |

☐ Few times per day

☐ Few times per day

17a) Before the pandemic I used to consume vegetables and nuts

17b) During the pandemic I consume vegetables and nuts

- ☐ Never or almost never
- ☐ Once or less per month
- ☐ Few times per month
- ☐ Few times per week
- ☐ Once a day
- ☐ Few times per day

- ☐ Never or almost never
- ☐ Once or less per month
- ☐ Few times per month
- ☐ Few times per week
- ☐ Once a day
- ☐ Few times per day

18a) Before the pandemic I used to consume meat  
and meat products

18b) Before the pandemic I used to consume meat  
and meat products

- ☐ Never or almost never
- ☐ Once or less per month
- ☐ Few times per month
- ☐ Few times per week
- ☐ Once a day
- ☐ Few times per day

- ☐ Never or almost never
- ☐ Once or less per month
- ☐ Few times per month
- ☐ Few times per week
- ☐ Once a day
- ☐ Few times per day

19a) Before the pandemic I used to consume fish and seafood

19b) During the pandemic I consume fish and seafood

- ☐ Never or almost never
- ☐ Once or less per month
- ☐ Few times per month
- ☐ Few times per week
- ☐ Once a day
- ☐ Few times per day

- ☐ Never or almost never
- ☐ Once or less per month
- ☐ Few times per month
- ☐ Few times per week
- ☐ Once a day
- ☐ Few times per day

20a) Before the pandemic I used to drink coffee

20b) During the pandemic I drink coffee

- ☐ Never or almost never
- ☐ Once or less per month
- ☐ Few times per month
- ☐ Few times per week
- ☐ Once a day
- ☐ Few times per day

- ☐ Never or almost never
- ☐ Once or less per month
- ☐ Few times per month
- ☐ Few times per week
- ☐ Once a day
- ☐ Few times per day

21a) Before the pandemic I used to drink tea

21b) Before the pandemic I drink tea

- ☐ Never or almost never
- ☐ Once or less per month
- ☐ Few times per month

- ☐ Never or almost never
- ☐ Once or less per month
- ☐ Few times per month

- ☐ Few times per week
- ☐ Once a day
- ☐ Few times per day

- ☐ Few times per week
- ☐ Once a day
- ☐ Few times per day

22a) Before the pandemic I used to drink water

- ☐ Never or almost never
- ☐ Once or less per month
- ☐ Few times per month
- ☐ Few times per week
- ☐ Once a day
- ☐ Few times per day

22b) During the pandemic I drink water

- ☐ Never or almost never
- ☐ Once or less per month
- ☐ Few times per month
- ☐ Few times per week
- ☐ Once a day
- ☐ Few times per day

23a) Before the pandemic I used to drink juice and sweet drinks 23b) During the pandemic I drink juice and sweet drinks

- ☐ Never or almost never
- ☐ Once or less per month
- ☐ Few times per month
- ☐ Few times per week
- ☐ Once a day
- ☐ Few times per day

- ☐ Never or almost never
- ☐ Once or less per month
- ☐ Few times per month
- ☐ Few times per week
- ☐ Once a day
- ☐ Few times per day

24a) Before the pandemic I used to drink alcohol

- ☐ Never or almost never
- ☐ Once or less per month
- ☐ Few times per month
- ☐ Few times per week
- ☐ Once a day
- ☐ Few times per day

24b) During the pandemic I drink alcohol

- ☐ Never or almost never
- ☐ Once or less per month
- ☐ Few times per month
- ☐ Few times per week
- ☐ Once a day
- ☐ Few times per day

26a) Before the pandemic I used exercise

- ☐ Never or almost never
- ☐ Once or less per month
- ☐ Few times per month
- ☐ Few times per week
- ☐ Once a day
- ☐ Few times per day

26b) During the pandemic I exercise

- ☐ Never or almost never
- ☐ Once or less per month
- ☐ Few times per month
- ☐ Few times per week
- ☐ Once a day
- ☐ Few times per day

| GENDER                                                                                           | AGE | EDUCATION                                                                                                                               | DURING PANDEMIC                                                                                                                                   |
|--------------------------------------------------------------------------------------------------|-----|-----------------------------------------------------------------------------------------------------------------------------------------|---------------------------------------------------------------------------------------------------------------------------------------------------|
| <input type="checkbox"/> Woman<br><input type="checkbox"/> Man<br><input type="checkbox"/> Other |     | <input type="checkbox"/> Primary education<br><input type="checkbox"/> Secondary education<br><input type="checkbox"/> Higher education | <input type="checkbox"/> I've gained weight<br><input type="checkbox"/> I've lost weight<br><input type="checkbox"/> My body mass haven't changed |
